# Supplementary material for: Cadmium- and zinc-directed assembly of nano-sized, resorcarene-based host architectures which strongly bind C60
Source: Royal Society of Chemistry journal article supplement (doi:10.1039/b000481m), 2000-01-01
Supplement: b000481m.doc [file b000481m.doc]

**Electronic Supplementary Information**

† Tetra(propylaminomethyl)resorc[4]arene was prepared from propylamine and tetrabromomethylresorcarene as described previously.1 Tetra(butylaminomethyl)-resorc[4]arene was synthesised in a similar manner.

Complexes **1**-**3** were prepared by the following general method:To a solution of tetrakis[(propylamino)]methylresorcarene (1.0 g, 0.92 mmol) and potassium hydroxide (0.216 g, 3.96 mmol) in ethanol-water (100 cm3:50 cm3) was added carbon disulphide (0.294 g, 4.0 mmol). After stirring for 2 hr, metal(II) acetate hydrate (2.0 mmol) was added and the mixture allowed to stir overnight. A white or cream precipitate that formed was removed by filtration and recrystallized from a dichloromethane-ethanol mixture. A second recrystallization from pyridine-water afforded hosts **1**-**3.**

Cd6(L1)3(py)67H2O **1** (59 %). Found: C 54.87, H 6.02, N 5.05 requires C 54.85, H 6.35,N 4.46 for C258H342N18O24S24Cd67H2O.

Cd6(L2)3(py)65H2O **2** (51 %). Found: C 54.31, H 6.07, N 4.41 requires C 54.26, H 6.07,N 4.63 for C246H318N18O24S24Cd65H2O.

Zn6(L1)3(py)6 **3** (57 %) Found: C 58.29, H 6.62, N 5.39 requires C 58.24, H 6.32,N 4.97 for C258H342N18O24S24Zn6.”

1. H. Boerrigter, W. Verboom and D. N. Reinhoudt, *J. Org. Chem.,* 1997, **62**, 7148.

Crystal data on the three compounds were collected with MoKa radiation using the MARresearch Image Plate System. The crystals were positioned at 100 mm from the Image Plate. 95 frames were measured at 2o intervals with a counting time of 10 mins. Data analyses were carried out with the XDS program.[1] The structures were solved using direct methods with the Shelx86 program.[2] The metal and sulphur atoms were refined anisotropically in all 3 structures and also the hexamer carbon atoms in 2-Cd. The alkyl chains in all 3 structures were refined isotropically with constraints. All the structures contained several molecules of disordered solvent. The structures were refined on F2 using Shelxl to R values of (R1, wR2) for observed data 0.112, 0.243 for 1-Cd, 0.141, 0.204 for 2-Cd and 0.141, 0.212 for 2-Zn. Details have been deposited at the Cambridge Crystallographic Data Centre with reference numbers CCDC xxxxxx- CCDC xxxxxx inclusive.

[1] W.Kabsch, *J.Appl.Cryst*. 1988 21 916

[2] Shelx86, G.M.Sheldrick, *Acta Cryst* 1990 A46 467

[3] Shelxl, G.M.Sheldrick, 1993, program for crystal structure refinement. University of Gottingen.

**Model calculations for Fig. 2**

The model shown in Fig. 2 was generated on a SG workstation using Cerius2 with the Universal Force Field”. Insert a symbol directing the reader to the ESI and include the following text in the ESI which provides a more detailed description of the model calculations: “The model shown in Fig. 2 was generated on a Silicon Graphics workstation using the Cerius2 software with the Universal Force Field. The coordinates of the zinc(II) host structure **4** were taken from the *X*-ray crystal structure. The fullerene was then placed within the cavity. Molecular mechanics calculations showed that there is a broad range of low energy positions for the fullerene within the cavity, indicating that it is significantly larger than the guest. The figure shows a low energy position in which the guest is in a central position where there are no significant contacts less than the sum of van der Waals radii between host and guest.

Note on NMR and MS: Although the solid-state structures of these compounds are proven unequivocally by X-ray diffraction, evidence for the retention of these hosts in solution has been more difficult to obtain. Examination of **1-4** using MALDI-TOF mass spectrometry has, to date, given only ions corresponding to fragmentation of the trimeric resorc[4]arene hosts into monomeric resorc[4]arene units with varying amounts of coordinated cadmium and zinc ions. 1H NMR spectra of hosts **1-4** (*d8* toluene or *d6* benzene) at room temperature exhibit broad resonances characteristic of the presence of the resorcarene ligands, but cannot otherwise confirm the retention of the trimeric structure in solution.

**UV-Vis Titration Experiments**

UV-vis titration experiments: Spectra were collected on a Cintra 10 spectrometer at 295 K and digitised at 0.5 nm intervals. Aliquots of host were added to solutions of C60 [1.07 x 10-6] in a quartz-glass cuvette with a 1 cm path length. Data analysis was performed with the computer program SPECFIT/32, Spectrum Software Associates, P.O. Box 4494, Chapel Hill, NC 27514-4494 USA. Binding constants were reproducible within 10%. These errors are significantly larger than those obtained by analysis of standard deviation in the data.

Note: In the visible region of the e-m spectra of zinc(II) hosts (**3** and **4**) only a very small almost negligible absorbance was observed. The cadmium(II) complexes however were more strongly yellow-coloured in this region. Because absorbance changes observed on addition of host are quite small, the effect of this was to reduce the accuracy of the binding constants determined with this host. This is manifested in the standard deviations of the binding constants.
